# Supplementary material for: Expansion-Based Clearing of Golgi-Cox-Stained Tissue for Multi-Scale Imaging
Source: Int J Mol Sci. 2022 Mar 25;23(7):3575. doi: 10.3390/ijms23073575 (PMC8998187; doi:10.3390/ijms23073575)
Supplement: Supplementary file 1 [file ijms-23-03575-s001.zip]

Archive with 4 entries (4 files):
- ijms-1617287-supplementary Video S1.mp4
- ijms-1617287-supplementary Video S2.mp4
- ijms-1617287-supplementary Video S3.mp4
- ijms-1617287-supplementary.pdf
