# Supplementary material for: Expansion-Based Clearing of Golgi-Cox-Stained Tissue for Multi-Scale Imaging
Source: Int J Mol Sci. 2022 Mar 25;23(7):3575. doi: 10.3390/ijms23073575 (PMC8998187; doi:10.3390/ijms23073575)
Supplement: Supplementary file 1 [file ijms-23-03575-s001.zip › ijms-1617287-supplementary.pdf]

# Expansion Based Clearing of Golgi-Cox Stain Tissue for Multi-Scale Imaging

## Supplementary Information

**Authors:** Qing-Hong Shan, Xin-Ya Qin, Nan Zhou, Xue-Yan Wu, Jiang-Ning Zhou

## Supplementary Figures

### Supplementary Table

### Supplementary Videos

Supplementary Figure S1: Whole-mount darkening of Golgi-Cox solution impregnated mouse brain.

Supplementary Figure S2: Tissue clearing with modified-MAP method.

Supplementary Figure S3: Interconnections between Golgi-Cox stained nerve fibers.

Supplementary Figure S4: Flow chart showing the main steps for clearing and immunostaining the Golgi-Cox stained tissue.

Supplementary Table S1: Compare current method with and Golgi-Cox stain and tissue clearing method.

Supplementary Table S2: List of antibodies used in this experiment.

Supplementary Video S1: 3D imaging of 2-mm-thick cleared Golgi-Cox stained tissue with two-photon microscopy

Supplementary Video S2: High-resolution 3D imaging of the connection between Golgi-Cox stained neuronal fibers and immunostain labeled astrocyte fibers. The cleared Golgi-Cox stained tissue is immunostained with GFAP and CX43. Astrocytes (labeled with GFAP) are shown in magenta, gap junction (labeled with CX43) are shown in green, and neuronal fibers (labeled with Golgi-Cox) are shown in red.

Supplementary Video S3: Three-dimensional observation of neuron-to-neuron and neuron-to-astrocyte connections in Golgi-Cox stained human brain tissue. The cleared Golgi-Cox stained tissue is immunostained with GFAP. Astrocytes (labeled with GFAP) are shown in green, and Golgi-Cox stained neurons are shown in red.

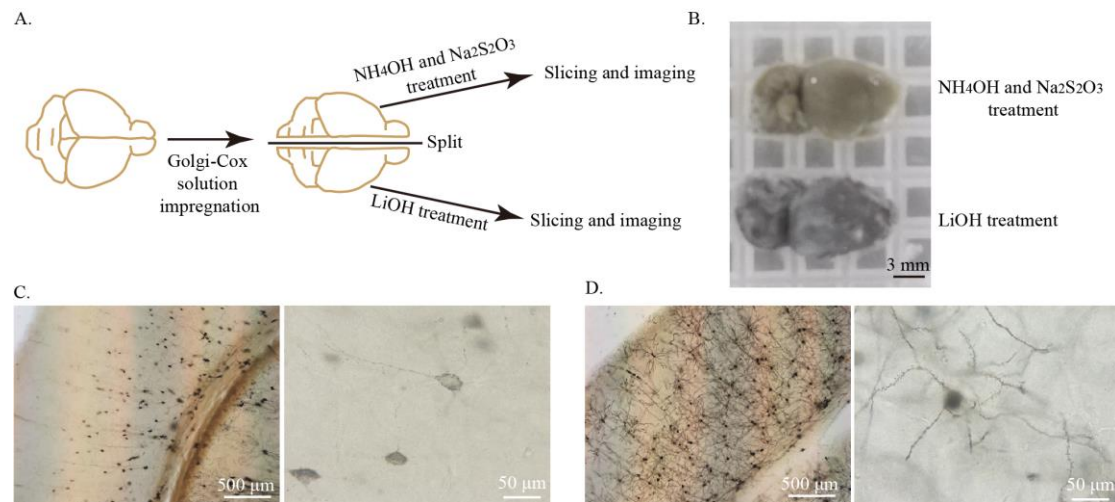

**Figure S1. Whole-mount darkening of Golgi-Cox solution impregnated mouse brain.** (A) Schematic diagram showing the procedure of darkening the two hemispheres from the same brain with the different darkening reagents. (B) The appearance of the two hemispheres darkens with the different darkening reagents. (C) Photomicrographs illustrating the result of whole-mount darkening hemispheres with long-term  $\text{NH}_4\text{OH}$  and  $\text{Na}_2\text{S}_2\text{O}_3$  treatment. Left panel: low magnification images showing the cortex after darkening. Right panel: high magnification images showing the neurons and neuronal fibers after darkening. (D) Photomicrographs illustrating the result of whole-mount darkening hemispheres with long-term  $\text{LiOH}$  treatment. Left panel: low magnification images showing the cortex after darkening. Right panel: high magnification images showing the neurons and neuronal fibers after darkening.

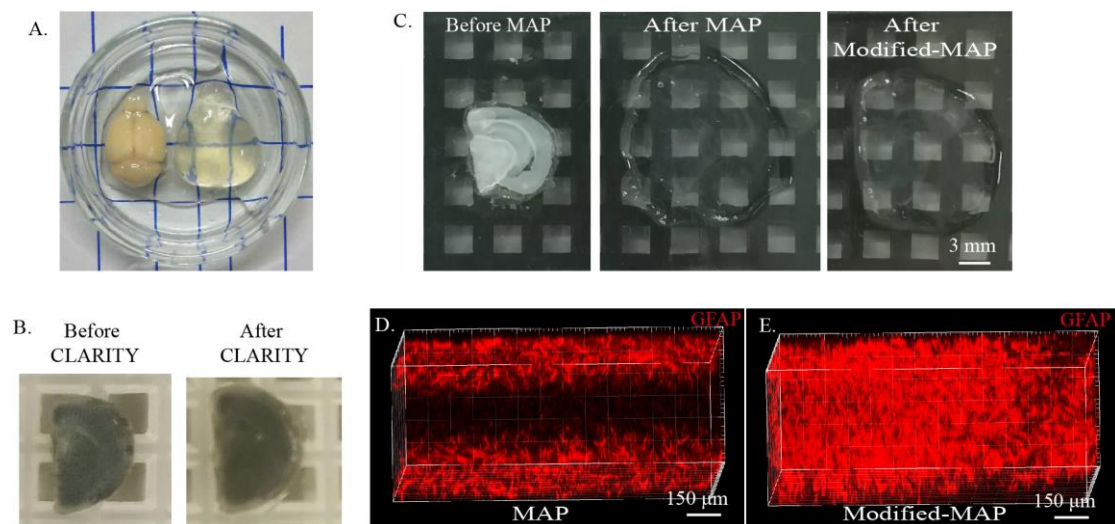

**Figure S2. Tissue clearing with modified-MAP method.** (A) Testing of the CLARITY method. (B) 1-mm-thick Golgi-Cox stained tissue before and after clearing with CLARITY. (C) 300- $\mu\text{m}$ -thick slices treated with MAP and modified-MAP. (D) 3D immunostaining of MAP and modified-MAP treated tissue with GFAP antibody. The 3D renderings showed vast increase in uniformity of labeling after modified-MAP treatment.

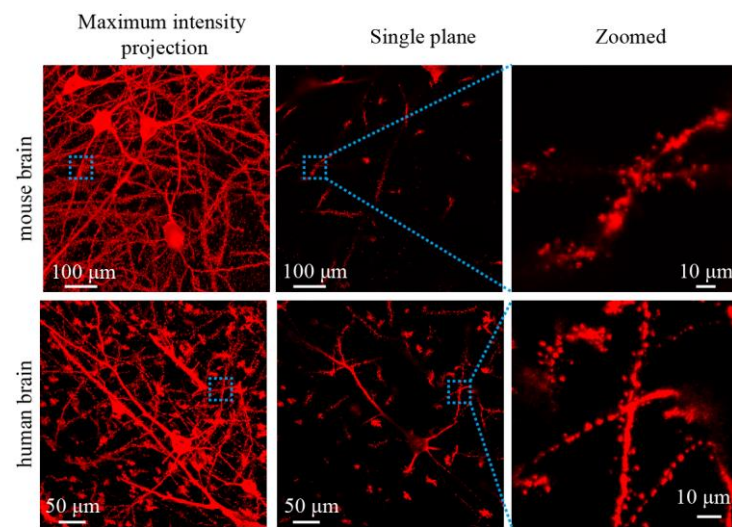

**Figure S3.** Observation of interconnections between nerve fibers in Golgi-Cox stained mouse and human brain tissue.

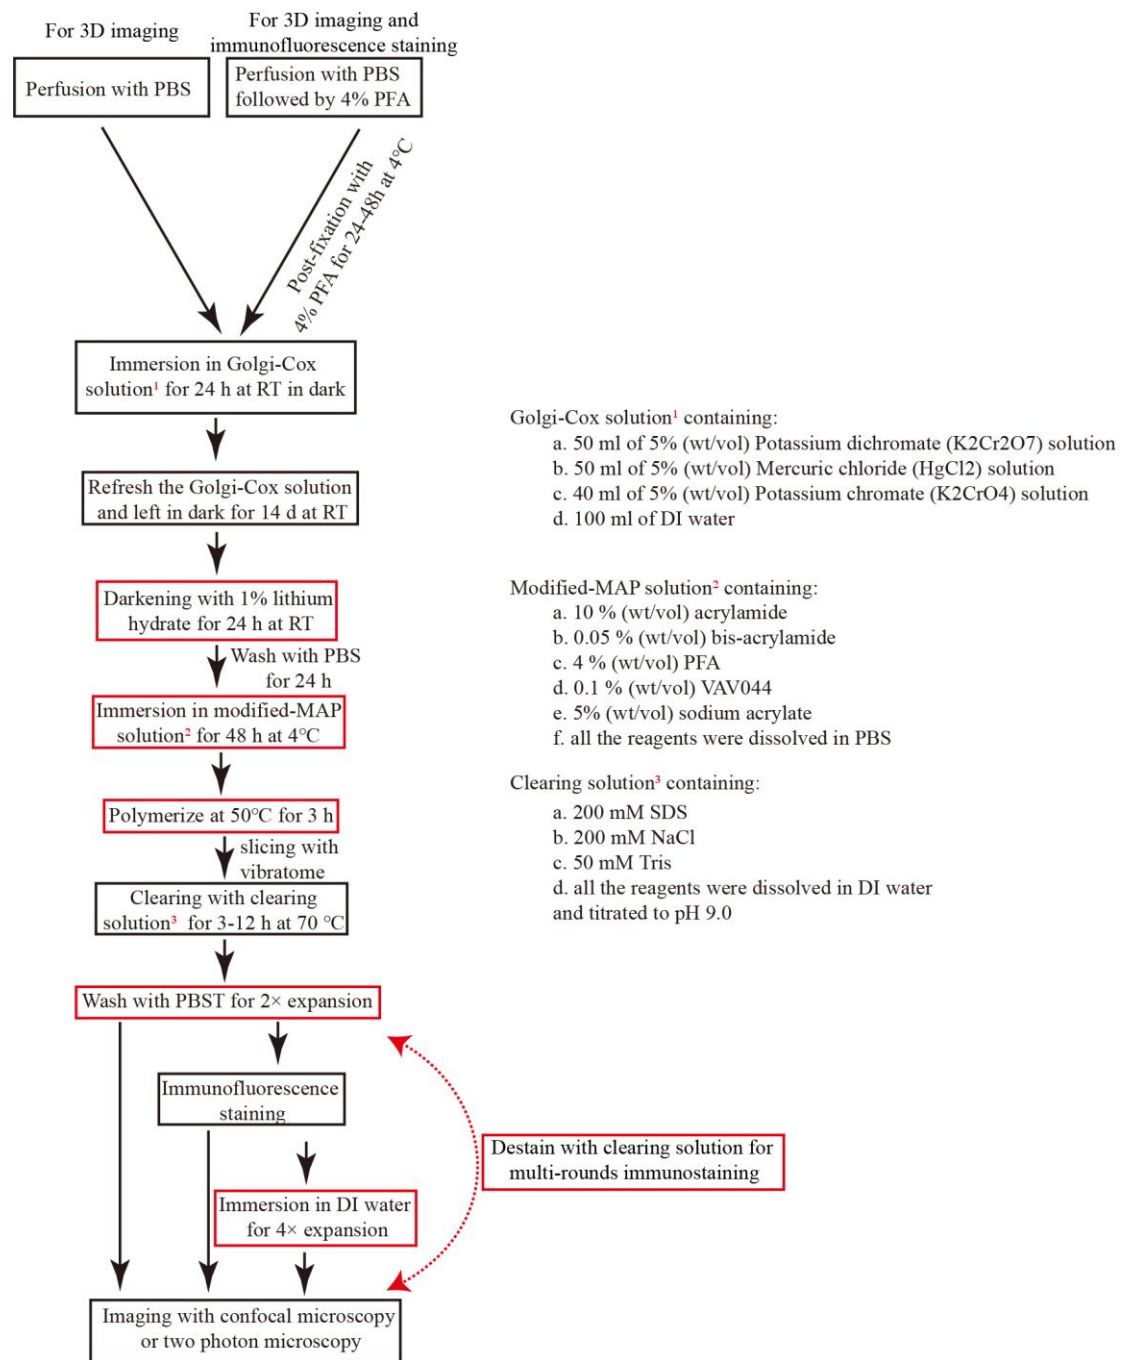

**Figure S4: Flow chart showing the main steps for clearing and immunostaining the Golgi-Cox stained tissue.** The steps marked in red boxes are the key steps for clearing, multi-rounds immunostaining, and 3D imaging of Golgi-Cox stained tissues. The solution recipes marked with red numbers in the flowchart are shown in the list on the right. These reagents are needed to be prepared for clearing and performing multi-rounds immunostaining of Golgi-Cox stained tissue. Note: RT, room temperature.

**Table S1: Compare current method with other Golgi-Cox stain and tissue clearing method.**

| Methods                 | Golgi-Cox stain combined with modified MAP (current method) | Standard Golgi-CoX [1]                    | Golgi-Cox stain combined with CLARITY [2] | Golgi-Cox stain combined with CUBIC [3]                | Standard MAP [4]          |
|-------------------------|-------------------------------------------------------------|-------------------------------------------|-------------------------------------------|--------------------------------------------------------|---------------------------|
| Tissue used             | Fresh or PFA fixed                                          | Fresh                                     | PFA fixed                                 | PFA fixed                                              | PFA fixed                 |
| Impregnation solution   | Standard Golgi-CoX solution                                 | Standard Golgi-CoX solution               | URG stock solution                        | Standard Golgi-CoX solution                            | N.T.                      |
| Darkening solution      | Lithium hydroxide                                           | Ammonium Hydroxide and Sodium Thiosulfate | Ammonium Hydroxide and Sodium Thiosulfate | Ammonium Hydroxide and Kodak Carestream Fixer solution | N.T.                      |
| Hydrogel solution       | Modified MAP solution with low acrylamide concentration     | N.T                                       | CLARITY solution                          | N.T                                                    | Standard MAP solution     |
| Hydrogel embedding      | YES                                                         | NO                                        | YES                                       | NO                                                     | YES                       |
| Clearing solution       | SDS solution                                                | N.T                                       | SDS solution                              | CUBIC solution                                         | SDS solution              |
| Clearing time           | 3-24 h                                                      | N.T.                                      | 48 h or less                              | 10 min-8 days                                          | 6-72 h                    |
| Tissue expansion        | YES, maximum 4× expansion                                   | N.T                                       | N.T                                       | N.T                                                    | YES, maximum 4× expansion |
| Immunostain compatible  | YES                                                         | N.T.                                      | YES                                       | N.T.                                                   | YES                       |
| 3D immunostain          | YES                                                         | N.T.                                      | N.T.                                      | N.T.                                                   | YES                       |
| Multi-round immunostain | YES                                                         | N.T.                                      | N.T.                                      | N.T.                                                   | YES                       |

**Note: N.T. , not tested**

**Table S2.** List of antibodies used in this experiment.

| Target       | Vendor                    | Catalog     | Host species | Clonality  | Dilution | Fluorescence<br>conjugation |
|--------------|---------------------------|-------------|--------------|------------|----------|-----------------------------|
| Somatostatin | Santa Cruz                | SC-55565    | Mouse        | monoclonal | 1:100    |                             |
| Parvalbumin  | Abcam                     | ab11427     | Rabbit       | polyclonal | 1:200    |                             |
| Calbindin    | Abcam                     | ab11426     | Rabbit       | polyclonal | 1:200    |                             |
| GFAP         | DAKO                      | Z0334       | Rabbit       | polyclonal | 1:200    |                             |
| Synapsin1    | Sigma                     | SAB4502904  | Rabbit       | polyclonal | 1:200    |                             |
| Connexin 43  | Abcam                     | ab219493    | Goat         | polyclonal | 1:200    |                             |
| MAP2         | Sigma                     | M2320       | Mouse        | monoclonal | 1:100    |                             |
| NF-H         | Sigma                     | N5389       | Mouse        | monoclonal | 1:200    |                             |
| CAMK2        | Santa Cruz                | SC-13082    | Rabbit       | polyclonal | 1:50     |                             |
| Rabbit IgG   | Jackson<br>Immunoresearch | 715-545-151 | Donkey       | polyclonal | 1:200    | Alexa fluor 488             |
| Rabbit IgG   | Jackson<br>Immunoresearch | 715-475-151 | Donkey       | polyclonal | 1:200    | Dylight 405                 |
| Goat IgG     | Jackson<br>Immunoresearch | 705-545-147 | Donkey       | polyclonal | 1:200    | Alexa fluor 488             |
| Mouse IgG    | Jackson<br>Immunoresearch | 715-545-151 | Donkey       | polyclonal | 1:200    | Alexa fluor 488             |

## Reference

1. Zaqout, S.; Kaindl, A. M., Golgi-Cox Staining Step by Step. *Frontiers in neuroanatomy* 2016, 10, 38.
2. Kassem, M. S.; Fok, S. Y. Y.; Smith, K. L.; Kuligowski, M.; Balleine, B. W., A novel, modernized Golgi-Cox stain optimized for CLARITY cleared tissue. *Journal of neuroscience methods* 2018, 294, 102-110.
3. Vints, K.; Vandael, D.; Baatsen, P.; Pavie, B.; Vernailen, F.; Corthout, N.; Rybakina, V.; Munck, S.; Gouko, N. V., Modernization of Golgi staining techniques for high-resolution, 3-dimensional imaging of individual neurons. *Scientific reports* 2019, 9, (1), 130.
4. Ku, T.; Swaney, J.; Park, J. Y.; Albanese, A.; Murray, E.; Cho, J. H.; Park, Y. G.; Mangena, V.; Chen, J.; Chung, K., Multiplexed and scalable super-resolution imaging of three-dimensional protein localization in size-adjustable tissues. *Nat Biotechnol* 2016, 34, (9), 973-81.
